# Supplementary material for: Amelioration of sodium arsenite induced toxicity by diallyl disulfide, a bioactive component of garlic: the involvement of antioxidants and the chelate effect
Source: Royal Society of Chemistry journal article supplement (doi:10.1039/c4ra00338a), 2014-01-01
Supplement: c4ra00338a1.pdf [file c4ra00338a1.pdf]

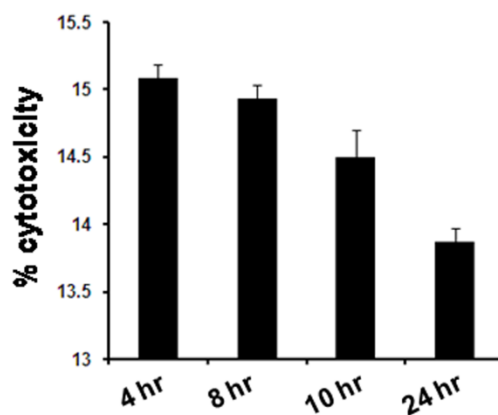

Supplementary Fig.1. Evaluation of the time dependant protective effect of DADS supplementation against NaAsO<sub>2</sub> induced cytotoxicity in HepG2 cells. The cells were treated with 10  $\mu$ M NaAsO<sub>2</sub> along with 50 $\mu$ M DADS for 4, 8, 10 and 24 hr respectively. Cell growth inhibition was measured by MTT assay. Data are the mean  $\pm$  SD from three replicate measurements.
